# Supplementary material
Source: Springer Nature journal article supplement (https://www.springermedizin.de/resource/supplementary/12885_2011_2969_MOESM6_ESM.pdf/9462412)

A

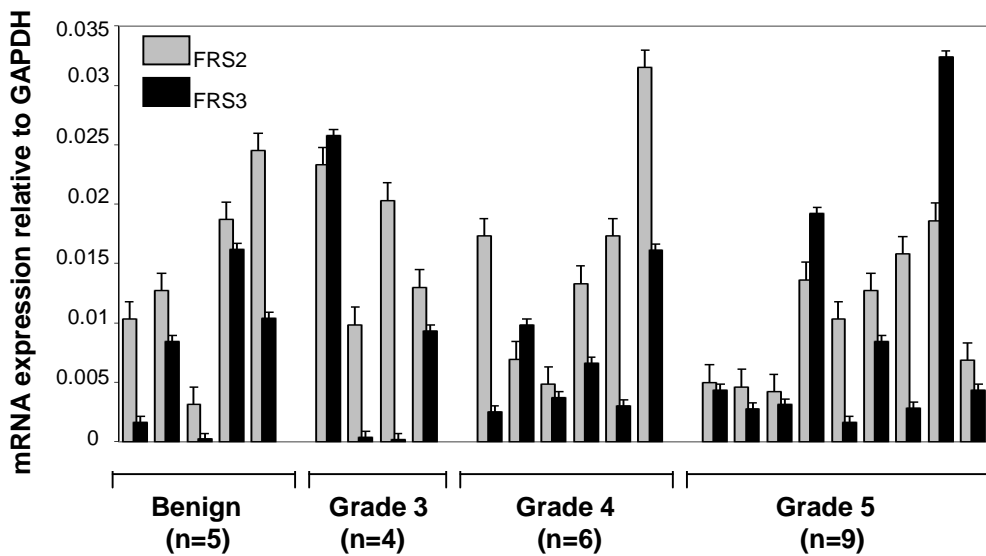

B

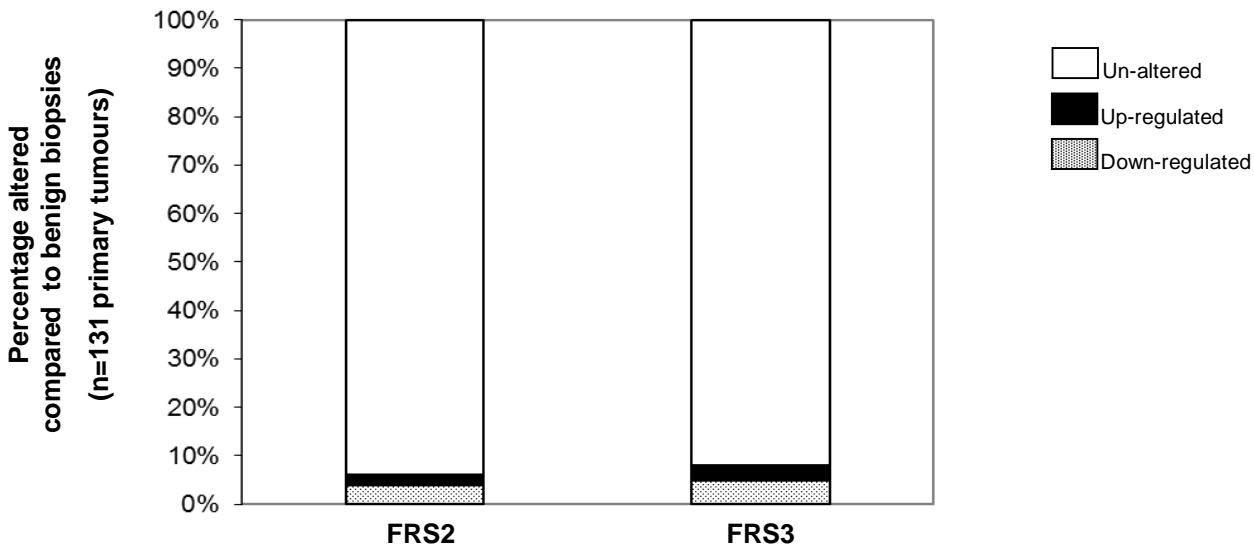

Supplement: MOESM6 [file 9462412]
